# Supplementary material
Source: PubMed Central journal article supplement (PMC8608810)
Supplement: 41416_2021_1566_MOESM5_ESM.pdf [file 41416_2021_1566_MOESM5_ESM.pdf]

7/Dec./2020

**JCRB Cell Bank**

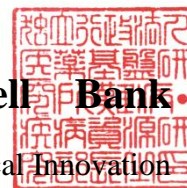

National Institute of Biomedical Innovation

7-6-8 Saito-Asagi, Ibaraki, Osaka, Japan

TEL : +81-72-641-9851

FAX : +81-72-641-9859

## Cell Authentication Report (KBN0761)

Client:

Tsuyoshi Takahashi

Department of gastroenterological Surgery

TEL : 06-6879-3251

FAX : 06-6879-3259

E-mail : ttakahashi2@gesurg.med.osaka-u.ac.jp

### Sample Information

-----

Sample Number : 1

1) Cell No. : KBN0761-01 (Cell Name : PC9)

# Peak report (Cell No. : KBN0761-01)

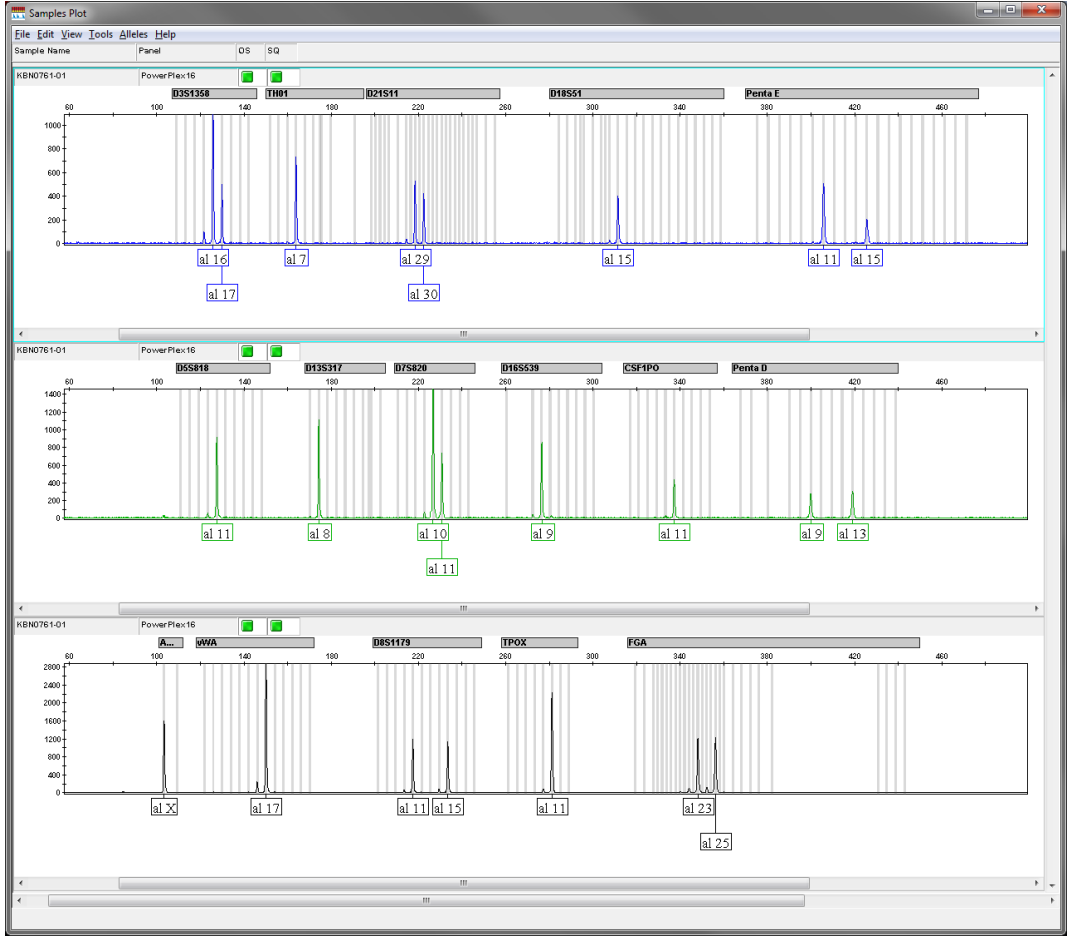

## STR Profile (Cell No. : KBN0761-01)

|                |                |                |                |                |                |
|----------------|----------------|----------------|----------------|----------------|----------------|
| <b>D3S1358</b> | <b>TH01</b>    | <b>D21S11</b>  | <b>D18S51</b>  | <b>Penta E</b> |                |
| 16,17          | 7              | 29,30          | 15             | 11,15          |                |
| <b>D5S818</b>  | <b>D13S317</b> | <b>D7S820</b>  | <b>D16S539</b> | <b>CSF1PO</b>  | <b>Penta D</b> |
| 11             | 8              | 10,11          | 9              | 11             | 9,13           |
| <b>AM</b>      | <b>vWA</b>     | <b>D8S1179</b> | <b>TPOX</b>    | <b>FGA</b>     |                |
| X              | 17             | 11,15          | 11             | 23,25          |                |

## Comparison with database (Cell No. : KBN0761-01)

| Cell No.          | Cell Name       | EV    | D5S818    | D13S317  | D7S820       | D16S539  | vWA       | TH01     | AM       | TPOX      | CSF1PO    |
|-------------------|-----------------|-------|-----------|----------|--------------|----------|-----------|----------|----------|-----------|-----------|
| <b>KBN0761-01</b> | <b>PC9</b>      | ----  | <b>11</b> | <b>8</b> | <b>10,11</b> | <b>9</b> | <b>17</b> | <b>7</b> | <b>X</b> | <b>11</b> | <b>11</b> |
| RCB4455           | PC-9            | 1.000 | 11        | 8        | 10,11        | 9        | 17        | 7        | X        | 11        | 11        |
| JCRB0251          | SCH             | 0.722 | 11        | 11,12    | 10,11        | 9        | 17        | 6,7      | X,Y      | 11        | 10,11     |
| RCB0692           | HTOA            | 0.667 | 11,13     | 8,10     | 9,10         | 9,13     | 17        | 7        | X        | 11        | 12,13     |
| RCB1773           | Lu-143          | 0.667 | 11        | 8        | 10,11        | 9,9      | 17,20     | 6        | X,Y      | 11        | 12        |
| ACC-260           | RD-ES           | 0.667 | 11        | 11,12    | 10           | 9,11     | 17        | 7        | X,Y      | 9,11      | 11        |
| CRL-5844          | NCI-H838 [H838] | 0.667 | 11        | 8        | 9            | 9,12     | 17        | 7        | X        | 8,11      | 10        |
| TKG 0623          | IHGGK           | 0.667 | 11        | 8,9      | 11           | 9,12     | 17,20     | 7        | X        | 9         | 11        |
| RCB1773           | Lu-143          | 0.667 | 11        | 8        | 10,11        | 9        | 17,20     | 6        | X,Y      | 11        | 12        |
| RCB0692           | HTOA            | 0.667 | 11,13     | 8,10     | 9,10         | 9,13     | 17        | 7        | X        | 11        | 12,13     |
| CRL-7227          | Hs 281.T        | 0.667 | 9,13      | 8,12     | 8,10         | 9,10     | 17        | 6,7      | X        | 11        | 11        |

## Summary (Cell No. : KBN0761-01)

It was confirmed that the cell (Cell No. : KBN0761-01, Cell Name: PC9) was the same as the cell registered in RIKEN BRC Cell Bank (RCB4455 PC-9), by the comparison with the database of JCRB Cell Bank.
