# Supplementary material
Source: PubMed Central journal article supplement (PMC8608810)
Supplement: 41416_2021_1566_MOESM8_ESM.pdf [file 41416_2021_1566_MOESM8_ESM.pdf]

**A form for ADDITION of co-authors**

Requested on 1<sup>st</sup> / July /2021

Journal name: British Journal of Cancer

Article ID: TH-2020-4296(202)

Article title: Targeted therapy for drug-tolerant persister cells after imatinib treatment for gastrointestinal stromal tumours

Authors: Tomo Ishida, Tsuyoshi Takahashi, Ryugo Teranishi, Toshirou Nishida, Seiichi Hirota, Satoshi Serada, Minoru Fujimoto, Tetsuji Naka, Yukinori Kurokawa, Takuro Saito, Kotaro Yamashita, Koji Tanaka, Kazuyoshi Yamamoto, Tomoki Makino, Makoto Yamasaki, Kiyokazu Nakajima, Hidetoshi Eguchi, and Yuichiro Doki

Dear Editor:

We would like to suggest Ryugo Teranishi as co-authors of the above mentioned manuscript. They contributed to acquisition of data for revised manuscript. All the original authors and new authors agreed to these changes and signed agreement form.

Sincerely yours

Tsuyoshi Takahashi

<<Signature>>

Tomo Ishida

<<Signature>>

Toshirou Nishida

<<Signature>>



May 31. 2021
